# Supplementary material for: Ternatin and improved synthetic variants kill cancer cells by targeting the elongation factor-1A ternary complex
Source: eLife. 2015 Dec 10;4:e10222. doi: 10.7554/eLife.10222 (PMC4786417; doi:10.7554/eLife.10222)
Supplement: Figure 1—source data 1. — DOI: http://dx.doi.org/10.7554/eLife.10222.004 [file elife-10222-fig1-data1.xlsx]

## Sheet: Sheet1
		Crossing point (nM)
Cell Line	Primary tumor site	ternatin (1)	4
MOLM-13	Haematopoietic and lymphoid tissue	87.9	3.2
OCI-LY3	Haematopoietic and lymphoid tissue	121.1	2.2
MM473	Skin	147.7	<0.9
MOLT-16	Haematopoietic and lymphoid tissue	155.3	3.7
MM138	Skin	174.6	<0.9
SH-4	Skin	180.7	<0.9
VM-CUB1	Urinary tract	226.2	6.7
Hs 936.T	Skin	321.8	<0.9
KYSE-150	Oesophagus	338.9	10.7
MM603	Skin	411.9	1
CFPAC-1	Pancreas	479	6.1
OCI-M1	Haematopoietic and lymphoid tissue	535.6	21.2
HCC-1588	Lung	603.4	17.3
BICR 31	Upper aerodigestive tract	653.6	19.6
HCC1143	Breast	738.4	16.8
SNU-878	Liver	1120	20.6
NCI-H661	Lung	2617.3	33
Hs 695T	Skin	4159.3	7.1
NCI-H1373	Lung	>30000	314.9
SK-MEL-2	Skin	>30000	51.2
SNU-349	Kidney	>30000	199.2
