# Supplementary figures and images for: Ternatin and improved synthetic variants kill cancer cells by targeting the elongation factor-1A ternary complex
Source: eLife journal article supplement (doi:10.7554/elife.10222), 2015-12-10

**a**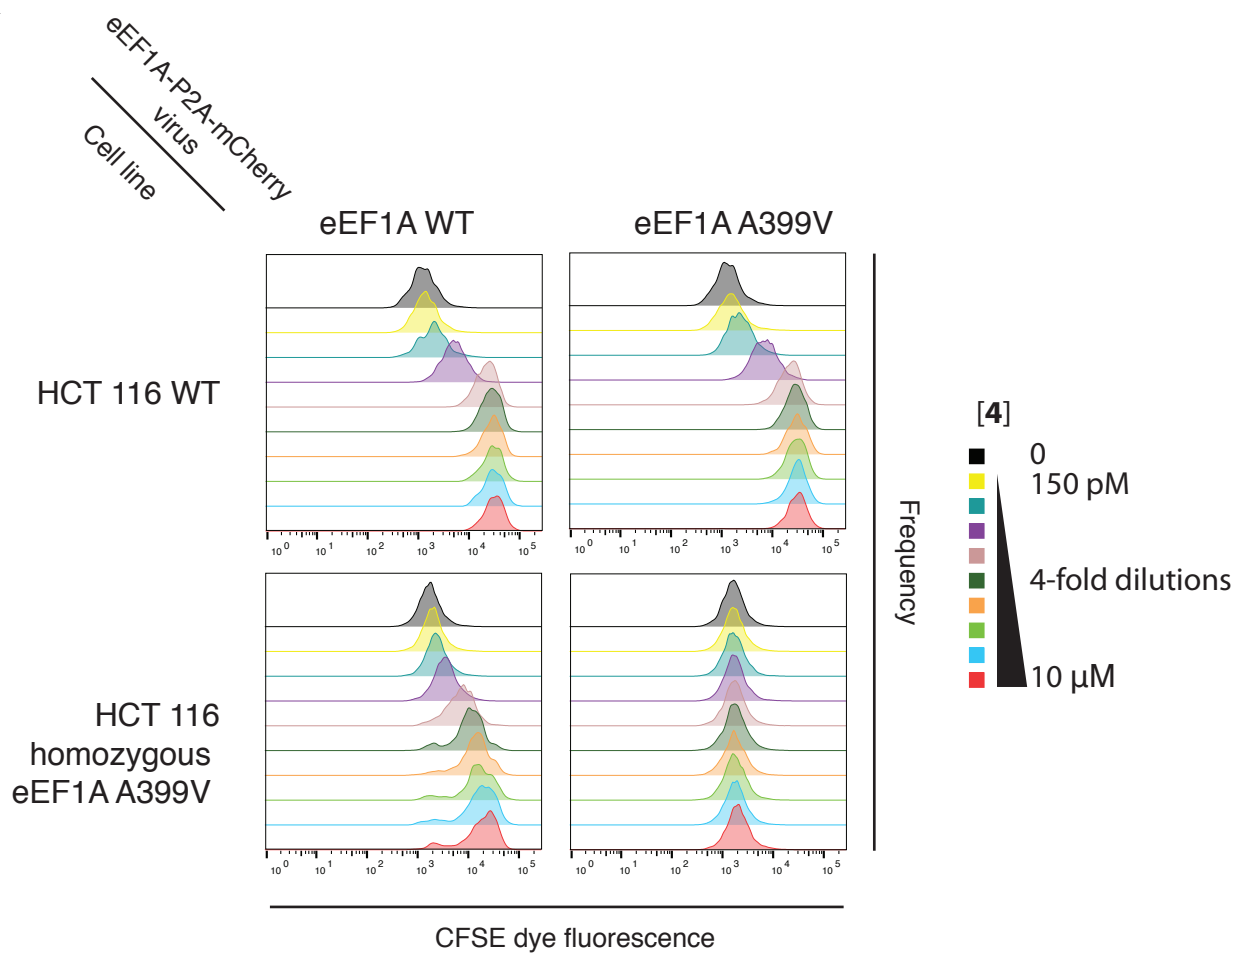**b**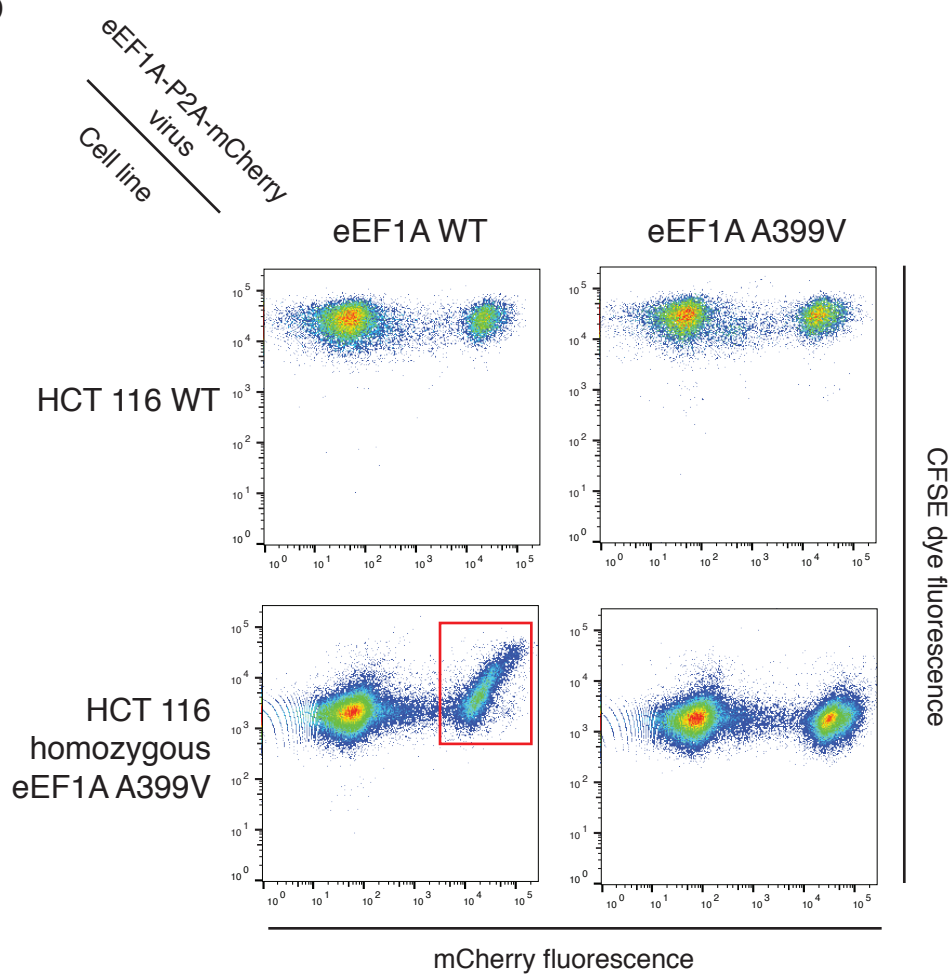

Supplement: supp [file elife-10222-supp-v1.zip]

**a**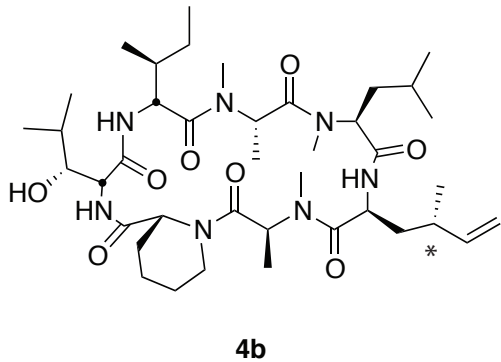**b**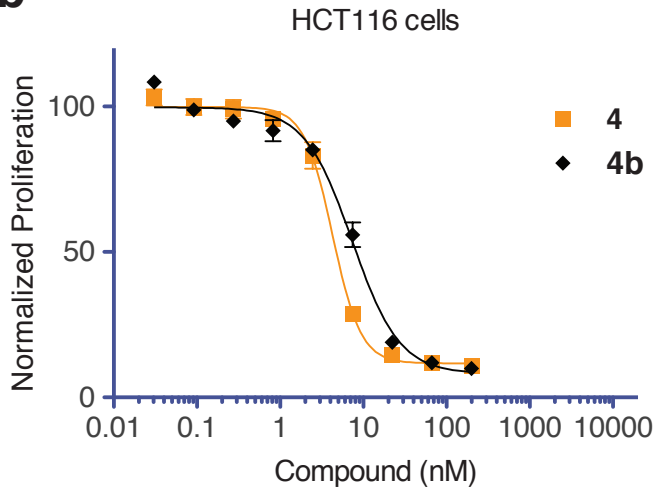

Supplement: supp [file elife-10222-supp-v1.zip]

**a** $[5] = 1 \mu\text{M}$  $[\text{DB}] (\mu\text{M})$  0.03

2 0

\*

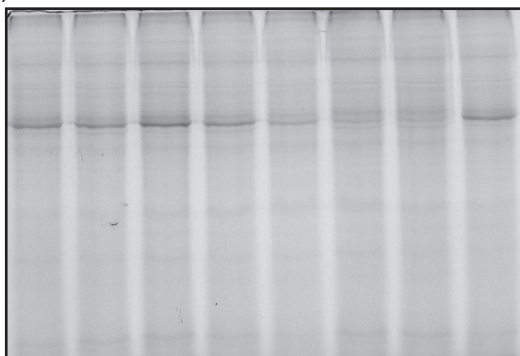

TAMRA

—250  
—150  
—100  
—75  
—50  
—37  
—25  
—20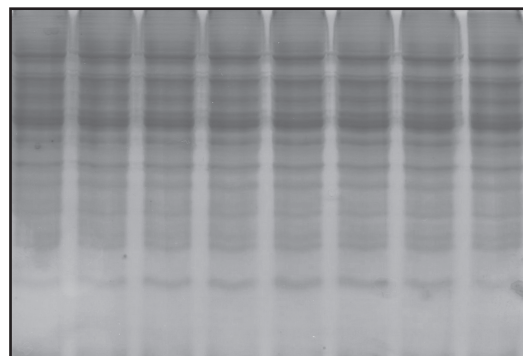

Coomassie

**b** $[5] = 1 \mu\text{M}$  $[\text{AB}] (\mu\text{M})$  0.03

2 0

\*

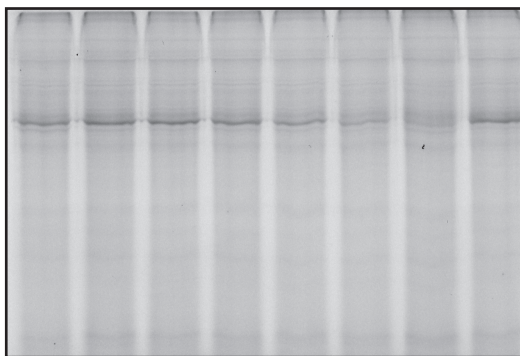

TAMRA

—250  
—150  
—100  
—75  
—50  
—37  
—25  
—20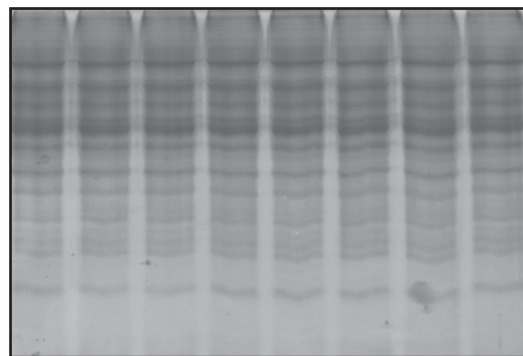

Coomassie

Supplement: supp [file elife-10222-supp-v1.zip]

**a**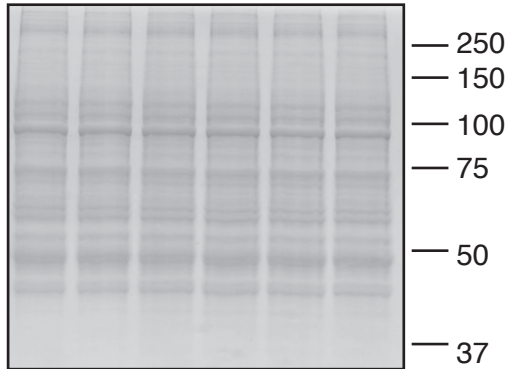

Coomassie

**b**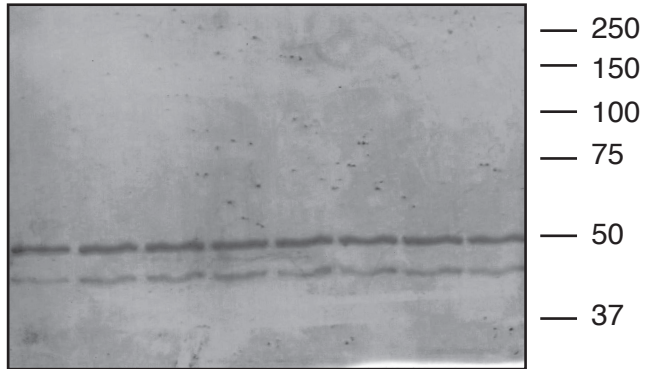

Coomassie

Supplement: supp [file elife-10222-supp-v1.zip]

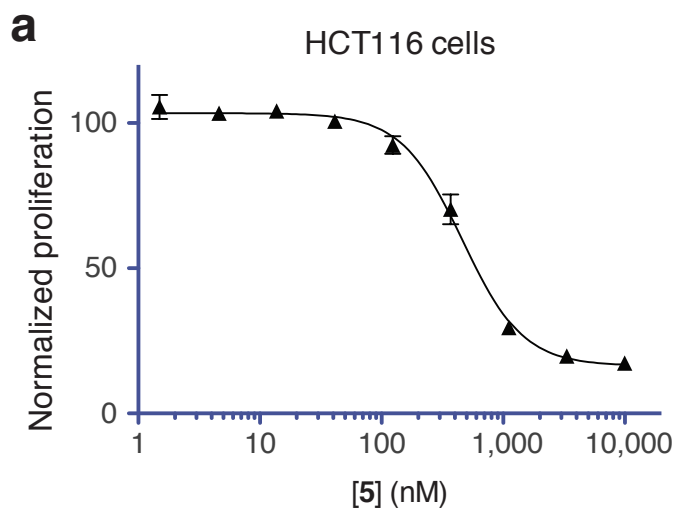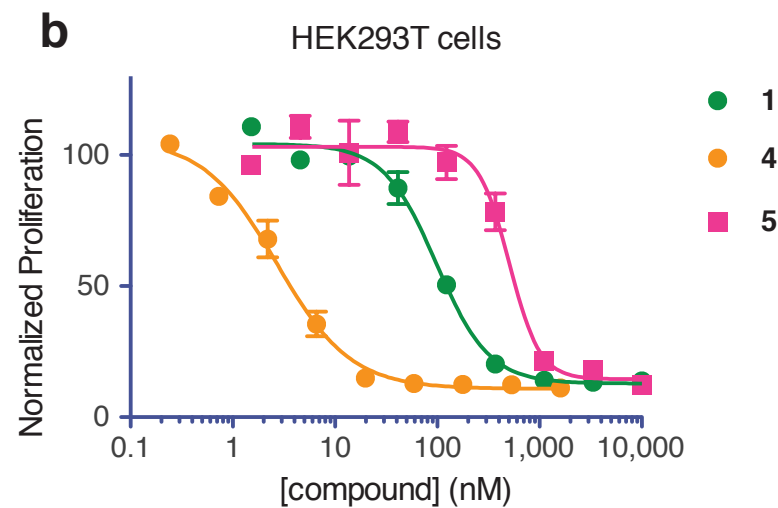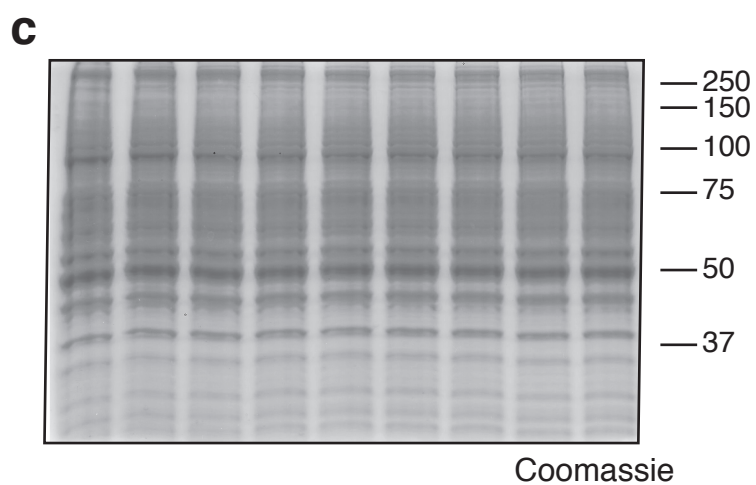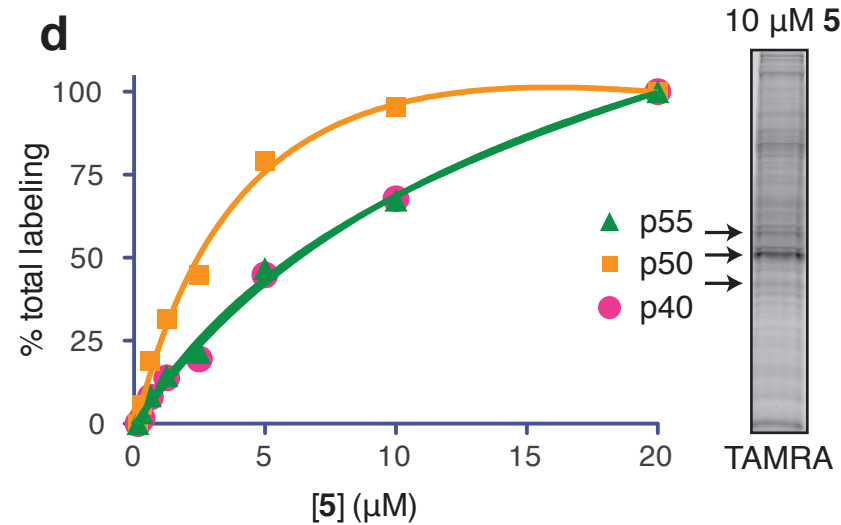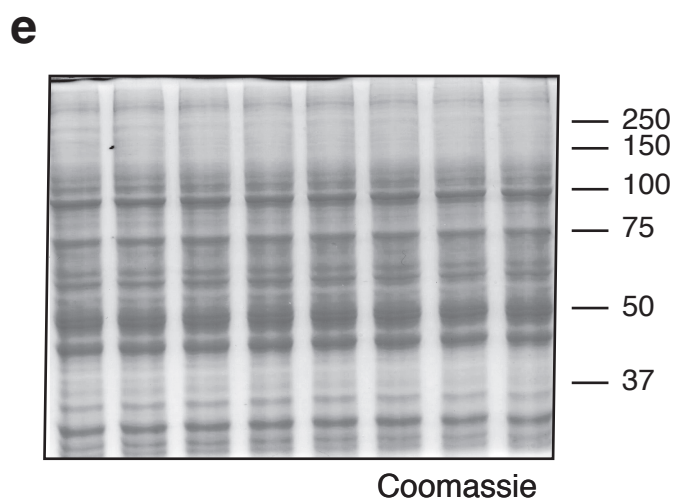

Supplement: supp [file elife-10222-supp-v1.zip]
